## Retraction: Superior efficacy of the antifungal agent ciclopirox olamine over gemcitabine in pancreatic cancer models

Chrysovalantou Mihailidou<sup>1</sup>, Pavlos Papakotoulas<sup>1,2</sup>, Athanasios G. Papavassiliou<sup>1</sup> and Michalis V. Karamouzis<sup>1,3</sup>

<sup>1</sup>Molecular Oncology Unit, Department of Biological Chemistry, Medical School, National and Kapodistrian University of Athens, 11527 Athens, Greece

<sup>2</sup>2nd Department of Medical Oncology, Theagenion Hospital, 54007 Thessaloniki, Greece

<sup>3</sup>First Department of Internal Medicine, Laiko Hospital, Medical School, National and Kapodistrian University of Athens, 11527 Athens, Greece

**Published:** July 10, 2024

**Copyright:** © 2024 Mihailidou et al. This is an open access article distributed under the terms of the [Creative Commons Attribution License](#) (CC BY 4.0), which permits unrestricted use, distribution, and reproduction in any medium, provided the original author and source are credited.

**This article has been retracted:** Multiple instances of internal image duplication, as well as images that appear in earlier published papers, have been discovered in this article. Specifically, Figures 2B, 3, 4A, 4B, 5A, 6B, and 6C all have western blot bands image duplications. In addition, Figure 3 contains a western blot from Figure 7 of a previously published paper of the same group of authors [1]. Figure 5 also contains identical data from another previously published paper of the same group [2]. In light of these issues, the journal requested clarification regarding these images from the authors. The data and comments provided to Oncotarget did not resolve the concerns about the integrity and reliability of the reported data. Therefore, with the agreement of all authors except the first author, Chrysovalantou Mihailidou, the Oncotarget Editors retract this article.

Original article: Oncotarget. 2018; 9:10360–10374. <https://doi.org/10.18632/oncotarget.23164>

### REFERENCES

1. Mihailidou C, Chatzistamou I, Papavassiliou AG, Kiaris H. Modulation of Pancreatic Islets' Function and Survival During Aging Involves the Differential Regulation of Endoplasmic Reticulum Stress by p21 and CHOP. *Antioxid Redox Signal*. 2017; 27:185–200. <https://doi.org/10.1089/ars.2016.6671>. [PubMed]
2. Mihailidou C, Chatzistamou I, Papavassiliou AG, Kiaris H. Improvement of chemotherapeutic drug efficacy by endoplasmic reticulum stress. *Endocr Relat Cancer*. 2015; 22:229–38. <https://doi.org/10.1530/ERC-15-0019>. [PubMed]
